# Supplementary material
Source: PubMed Central journal article supplement (PMC4048918)
Supplement: NIHMS585615-supplement-1.pdf [file NIHMS585615-supplement-1.pdf]

# Supplemental Data

**A**

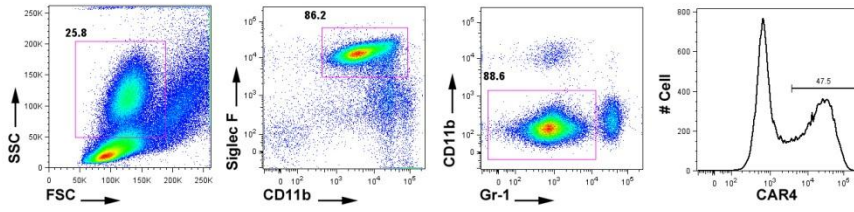

**B**

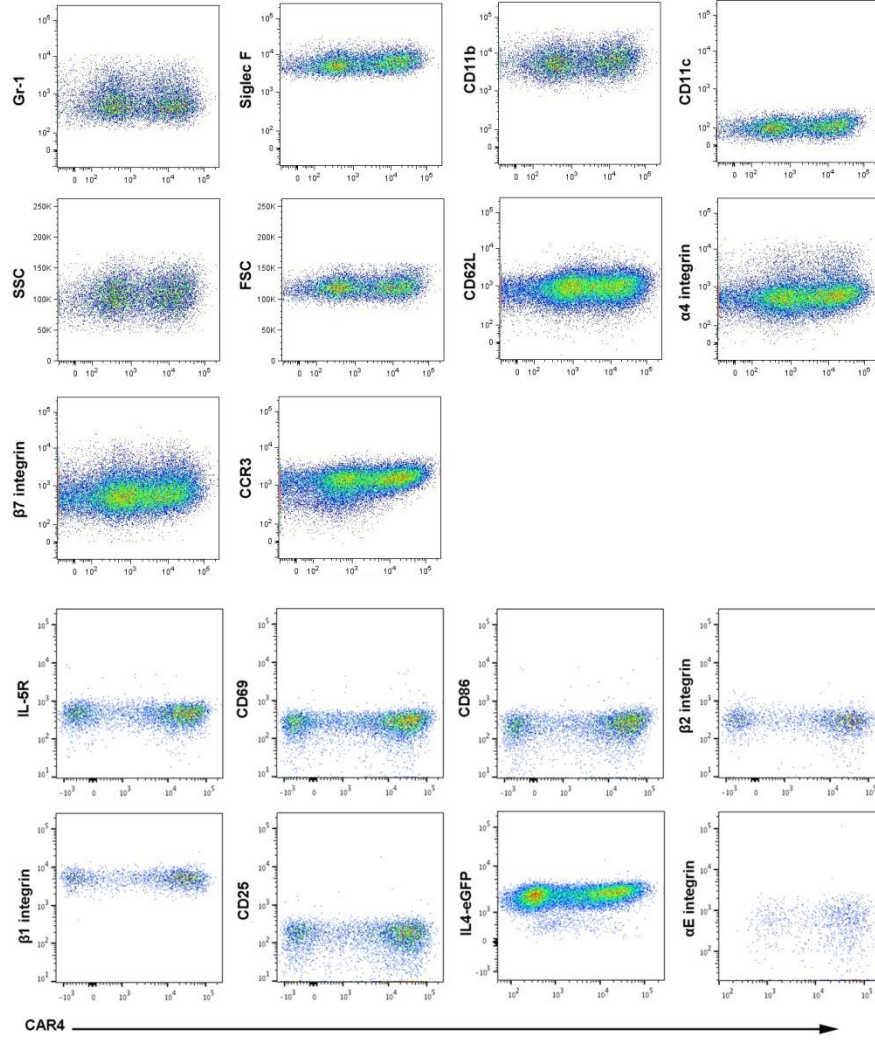

**C**

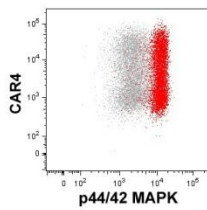

**D**

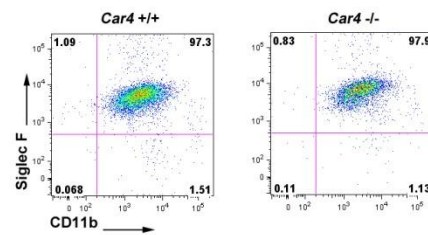

**Figure S1. Bronchoalveolar eosinophil CAR4 expression in ovalbumin-induced asthma model and association with eosinophil lineage markers.**

A, Mice were intranasally challenged with ovalbumin (OVA) after OVA/Alum sensitization. Bronchoalveolar (BALF) cells were extracted, and eosinophils were serially gated as  $SSC^{high}Siglec-F^{+}CD11b^{+}GR-1^{+}CD11c^{-}$ . A histogram of CAR4 surface expression of gated eosinophils is exhibited. B, Bronchoalveolar (BALF) eosinophils from *Aspergillus*-challenged mice were studied by FACS after serial eosinophil gating as  $SSC^{high}Siglec-F^{+}CD11b^{+}CD11c^{-}$ . The double-plot between CAR4 and a panel of eosinophil surface markers and intracellular IL-4. C, Bone marrow-derived eosinophils were stimulated with media or 25 ng/mL eotaxin for 2 minutes. p44/42 MAPK activation was analyzed by FACS (media, grey; red, eotaxin, superimposed). D, Bone marrow from *Car4*<sup>+/+</sup> and *Car4*<sup>-/-</sup> mice were differentiated in vitro with IL-5 (10 ng/mL). When the culture matured at day 14, eosinophils from both genotypes were stained for the eosinophil markers Siglec-F and CD11b, which were double-plotted after FACS analysis.



**Figure S2. CAR4 differential expression on multiple leukocytes, eosinophil engraftment efficiency after bone marrow transplant and direct allergen challenge on *Car4*<sup>+/+</sup> and *Car4*<sup>-/-</sup> mice.** A, Total WBC isolated from the OVA or saline -challenged lung, BALF and blood were co-stained with CAR4 and lineage specific markers (CD3, CD22, Siglec F, Gr-1, CD11c). After serial gating CAR4 expression histograms were shown on individual major leukocytes with Ig G control, saline vs. OVA challenge. \* Saline histogram not available due to low physiological presence in specific compartment. B, Bone marrow transplant (BMT) was performed with *Car4*<sup>+/+</sup> and *Car4*<sup>-/-</sup> donors, with donors represented by the CD45.2 allele and recipients represented by the CD45.1 allele. Allergen challenge was initiated after CD11b<sup>+</sup> cell engraftment reached > 99%. Bronchoalveolar (BALF) cells were FACS stained for CD45.1 and CD45.2 together with eosinophil (EOS) markers. After serial gating, total BALF eosinophil events were double-plotted for CD45.1 and CD45.2, indicating the presence of minimal residual native eosinophils by CD45.1 staining. C, *Car4*<sup>+/+</sup> and *Car4*<sup>-/-</sup> mice were directly subjected to *aspergillus* challenge, and bronchoalveolar (BALF) cells were extracted and stained for eosinophils (EOS). Total eosinophil levels were quantified by FACS enumeration.

**Table S1. A cluster of 82 significant genes dysregulated in lung eosinophils following eosinophil activation**

| <b>Gene symbol</b>               | <b>Transcripts ID</b> | <b>Corrected p-value</b> | <b>Fold change</b> |
|----------------------------------|-----------------------|--------------------------|--------------------|
| <i>Chi3l3</i>                    | 10501020              | 0.020123405              | 42.52882           |
| <i>Car4</i>                      | 10379866              | 0.011772152              | 35.67207           |
| <i>Mmp12</i>                     | 10583056              | 0.012553694              | 32.577866          |
| <i>Retnla</i>                    | 10436095              | 0.012553694              | 28.131536          |
| <i>Cd34</i>                      | 10352905              | 3.74E-04                 | 13.787505          |
| <i>Slc24a3</i>                   | 10476740              | 3.74E-04                 | 9.795526           |
| <i>Enah</i>                      | 10360764              | 0.03067765               | 9.6138735          |
| <i>Egr2</i>                      | 10363735              | 0.019077016              | 9.051489           |
| <i>ENSMUSG00000075583</i>        | 10429856              | 0.015867045              | 7.5380507          |
| <i>Qpct</i>                      | 10447056              | 0.011221767              | 6.8903117          |
| <i>Lipg</i>                      | 10459772              | 0.012553694              | 6.7715683          |
| <i>EG619945</i>                  | 10522494              | 0.027692037              | 6.647062           |
| <i>Hexb</i>                      | 10411373              | 0.03067765               | 6.6313777          |
| <i>Epx</i>                       | 10389654              | 0.0390082                | 5.7389402          |
| <i>Igsf2</i>                     | 10500656              | 0.010656019              | 5.6727343          |
| <i>Acp5</i>                      | 10591739              | 0.023440124              | 5.572733           |
| <i>Fbp1</i>                      | 10410007              | 0.015867045              | 5.088261           |
| <i>Gem</i>                       | 10503334              | 0.02661104               | 5.01466            |
| <i>Olfm4</i>                     | 10416689              | 0.038477343              | 5.014239           |
| <i>Acpp</i>                      | 10596303              | 0.026719332              | 5.0104766          |
| <i>Pdk3</i>                      | 10605711              | 0.04906303               | 4.9510646          |
| <i>Adam19 LOC100045780</i>       | 10375402              | 0.023440124              | 4.7417             |
| <i>Il10ra</i>                    | 10593050              | 0.010656019              | 4.4473867          |
| <i>4930422I07Rik</i>             | 10587655              | 0.04866087               | 4.3352757          |
| <i>Cd36</i>                      | 10528207              | 0.028912721              | 4.143904           |
| <i>Itgax</i>                     | 10557895              | 0.02661104               | 4.093909           |
| <i>Fbxl5</i>                     | 10529801              | 0.04605049               | 4.0551987          |
| <i>Atp10a</i>                    | 10553788              | 9.87E-04                 | 3.9973352          |
| <i>Ccng2</i>                     | 10523297              | 0.019816801              | 3.9772398          |
| <i>LOC641050</i>                 | 10538890              | 0.038456343              | 3.941187           |
| <i>Gpr109a</i>                   | 10533720              | 0.011221767              | 3.838058           |
| <i>Adora2b</i>                   | 10376832              | 0.038456343              | 3.674053           |
| <i>H1f0</i>                      | 10425207              | 0.043288305              | 3.6016552          |
| <i>Dusp16</i>                    | 10548735              | 0.027166395              | 3.5922003          |
| <i>LOC100043256 LOC100045314</i> | 10394674              | 0.03067765               | 3.5826468          |
|                                  | 10401931              | 0.04906303               | 3.5532143          |
| <i>BC005685</i>                  | 10401937              | 0.049180653              | 3.552429           |
| <i>Agl</i>                       | 10501699              | 0.023440124              | 3.4923165          |

|                                                               |          |             |            |
|---------------------------------------------------------------|----------|-------------|------------|
| <i>Itgae</i>                                                  | 10378286 | 0.038477343 | 3.4668324  |
| <i>Atp6v0a1</i>                                               | 10381187 | 0.011221767 | 3.4058828  |
| <i>Thex1</i>                                                  | 10578193 | 0.036152624 | 3.2520716  |
| <i>Bcl2l1</i>                                                 | 10488655 | 0.043288305 | 3.1740775  |
| <i>Dach1</i>                                                  | 10421950 | 0.047537882 | 3.0386393  |
| <i>Peg10</i>                                                  | 10536294 | 0.043288305 | 2.9797645  |
| <i>Rcn3</i>                                                   | 10563077 | 0.03067765  | 2.9610248  |
| <i>Lpin1</i>                                                  | 10399478 | 0.03376373  | 2.8765237  |
| <i>Dnajb9</i>                                                 | 10400137 | 0.030054986 | 2.7960322  |
| <i>Cxcl15</i>                                                 | 10523145 | 0.04510691  | 2.7402875  |
| <i>Hebp1</i>                                                  | 10548761 | 0.021281991 | 2.7362695  |
| <i>Syne2</i>                                                  | 10396608 | 0.043288305 | 2.7275488  |
| <i>Grn</i>                                                    | 10381588 | 0.02541297  | 2.718068   |
| <i>Tgm1</i>                                                   | 10420114 | 0.0390082   | 2.6799421  |
| <i>Lrp12</i>                                                  | 10428353 | 0.043288305 | 2.6363497  |
| <i>Creb5 9430076C15Rik</i>                                    | 10538338 | 0.030080006 | 2.6045067  |
| <i>Ncoa7</i>                                                  | 10368534 | 0.038477343 | 2.5973206  |
| <i>Lrrk2</i>                                                  | 10426315 | 0.036152624 | 2.556557   |
| <i>Itgb5</i>                                                  | 10435305 | 0.028912721 | 2.5161908  |
| <i>Casd1</i>                                                  | 10536273 | 0.023440124 | 2.4850545  |
| <i>Lpp</i>                                                    | 10434806 | 0.029829124 | 2.4654164  |
|                                                               | 10439126 | 0.04906303  | 2.4514234  |
| <i>Clec4b2</i>                                                | 10541599 | 0.03067765  | 2.3788     |
| <i>Fndc3a</i>                                                 | 10421488 | 0.02661104  | 2.3762236  |
| <i>Socs2</i>                                                  | 10372069 | 0.027239867 | 2.3307993  |
| <i>Pparg</i>                                                  | 10540897 | 0.03067765  | 2.2948604  |
| <i>Cpeb2</i>                                                  | 10521602 | 0.029829124 | 2.2172782  |
| <i>Ski</i>                                                    | 10519105 | 0.021464612 | 2.2114406  |
| <i>Mif LOC100040259 LOC100044948</i>                          | 10590972 | 0.02661104  | 2.173588   |
| <i>Zmpste24</i>                                               | 10516007 | 0.03929183  | 2.1373615  |
| <i>Btg3 EG654432 LOC100048453</i>                             | 10445875 | 0.026719332 | 2.1239157  |
| <i>Hmgb2</i>                                                  | 10518350 | 0.038477343 | 2.0664415  |
| <i>Hmgb2</i>                                                  | 10518352 | 0.03067765  | 2.0364242  |
|                                                               | 10407511 | 0.04510691  | 2.0323768  |
| <i>Hmgn2 LOC100041826 LOC100042405 LOC100044482 LOC637089</i> | 10403108 | 0.035860922 | 2.024345   |
| <i>Odc1</i>                                                   | 10394770 | 0.038456343 | 2.0198333  |
| <i>Oxct1</i>                                                  | 10422608 | 0.001760333 | 2.0116272  |
| <i>Btg3 EG654432 LOC100048453</i>                             | 10440419 | 0.029829124 | 2.0090618  |
| <i>Grina</i>                                                  | 10424781 | 0.03597291  | 2.006432   |
| <i>Uxs1</i>                                                   | 10354258 | 0.038456343 | 2.0024579  |
| <i>A230054D04Rik</i>                                          | 10529758 | 0.036152624 | -2.1741998 |

|               |          |             |            |
|---------------|----------|-------------|------------|
| <i>Hdc</i>    | 10487238 | 0.04605049  | -2.1786325 |
| <i>Ifitm3</i> | 10569017 | 0.021045567 | -2.2407992 |
| <i>Ston2</i>  | 10401891 | 0.03067765  | -3.0209856 |

**Table S2. Cluster of 37 significant genes dysregulated in the lung tissue following adoptive transfer of *Car4*<sup>+/+</sup> and *Car4*<sup>-/-</sup> bone marrow and subsequent allergen challenge**

| Gene symbol              | Transcripts ID | Corrected p value | Fold change |
|--------------------------|----------------|-------------------|-------------|
| <i>Krt4</i>              | 17322075       | 2.60E-05          | 4.634779    |
| <i>Car1</i>              | 17404180       | 8.64E-04          | 3.8990877   |
| <i>Krt13</i>             | 17269347       | 3.81E-06          | 2.6850803   |
| <i>Slc4a1</i>            | 17270162       | 4.63E-04          | 2.6533484   |
| <i>Rhd</i>               | 17419799       | 8.17E-04          | 1.9614452   |
| <i>Kel</i>               | 17466360       | 0.001790935       | 1.8940217   |
| <i>Ctrb1</i>             | 17513149       | 0.001304072       | 1.8876956   |
| <i>Spnb1</i>             | 17282025       | 8.24E-05          | 1.7933112   |
| <i>MMCHR2_CTG5</i>       | 17376441       | 2.00E-04          | 1.7366759   |
| <i>Scarna13 Mir3069</i>  | 17283767       | 2.61E-05          | 1.6444792   |
| <i>Ngp</i>               | 17522369       | 0.001230088       | 1.6360868   |
| <i>Lor</i>               | 17407378       | 3.39E-05          | 1.6342173   |
| <i>Krtdap</i>            | 17476557       | 1.52E-05          | 1.6080148   |
| <i>Defb4</i>             | 17499594       | 8.65E-05          | 1.5839739   |
| <i>Acta1</i>             | 17513995       | 0.001037918       | 1.5746803   |
| <i>Ank1</i>              | 17500005       | 8.00E-04          | 1.5726726   |
| <i>Hemgn</i>             | 17425028       | 0.002175863       | 1.569011    |
|                          | 17534980       | 9.02E-04          | 1.5477122   |
| <i>Lce1c Lce1k</i>       | 17399899       | 0.002330717       | 1.519077    |
| <i>Pnlip</i>             | 17360751       | 0.001280171       | 1.5026282   |
| <i>Tgm3</i>              | 17376191       | 2.09E-04          | 1.4853709   |
|                          | 17480566       | 0.002049547       | 1.4712522   |
| <i>Mt4</i>               | 17503926       | 2.93E-04          | 1.4662353   |
|                          | 17512852       | 0.002534825       | 1.4587873   |
| <i>Slc10a6</i>           | 17450319       | 1.66E-04          | 1.454301    |
|                          | 17366151       | 0.001186414       | 1.4481643   |
|                          | 17299313       | 1.65E-04          | 1.4293107   |
| <i>Rptn</i>              | 17399981       | 5.88E-05          | 1.4224306   |
| <i>Ros1</i>              | 17240750       | 3.50E-05          | 1.4189394   |
| <i>Mir1192</i>           | 17358219       | 9.97E-04          | 1.4143491   |
| <i>Scarna3a Mir1843b</i> | 17218565       | 4.88E-04          | -1.449122   |
| <i>Tmc5</i>              | 17482133       | 0.00205291        | -1.7606255  |
| <i>A130040M12Rik</i>     | 17267418       | 4.36E-04          | -1.8176857  |
| <i>Nlrp1c</i>            | 17265526       | 8.02E-04          | -1.8641099  |
| <i>Ig V (Chr6)</i>       | 17459403       | 8.03E-04          | -1.9116696  |
| <i>MMCHR12_CTG7</i>      | 17284645       | 5.18E-05          | -2.2648532  |
| <i>IgK (Chr6)</i>        | 17459341       | 0.002515408       | -5.6372733  |
